# Supplementary material for: Soluble Endoglin as a Potential Biomarker of Nonalcoholic Steatohepatitis (NASH) Development, Participating in Aggravation of NASH-Related Changes in Mouse Liver
Source: PubMed Central journal article supplement (PMC7731045; doi:10.3390/ijms21239021), 2020-11-27
Supplement: ijms-21-09021-s001.pdf [file ijms-21-09021-s001.pdf]

**Table S1** Pre-designed TaqMan® Gene Expression Assay kits (Life Technologies) used for quantitative real-time RT-PCR

| Gene symbol                       | Transporter/Receptor | Life Technologies cat. number |
|-----------------------------------|----------------------|-------------------------------|
| <i>Klf6</i>                       |                      | Mm00516184_m1                 |
| <i>Cd36</i>                       |                      | Mm00432403_m1                 |
| <i>Acaca</i>                      |                      | Mm01304257_m1                 |
| <i>Fasn</i>                       |                      | Mm00662319_m1                 |
| <i>Scd1</i>                       |                      | Mm00772290_m1                 |
| <i>Cpt1a</i>                      |                      | Mm01231183_m1                 |
| <i>Ppara<math>\alpha</math></i>   |                      | Mm00440939_m1                 |
| <i>Acacb</i>                      |                      | Mm01204671_m1                 |
| <i>Ppargc1<math>\alpha</math></i> |                      | Mm01208835_m1                 |
| <i>Mttp</i>                       |                      | Mm00435015_m1                 |
| <i>Apob</i>                       |                      | Mm01545150_m1                 |
| <i>IL-6</i>                       |                      | Mm00446190_m1                 |
| <i>Tgf-<math>\beta</math>1</i>    |                      | Mm01178820_m1                 |
| <i>Acta2</i>                      | $\alpha$ -SMA        | Mm01546133_m1                 |
| <i>Colla1</i>                     |                      | Mm00801666_g1                 |
| <i>Pdgfb</i>                      |                      | Mm00440677_m1                 |
| <i>Nqo1</i>                       |                      | Mm01253561_m1                 |
| <i>Hmox1</i>                      |                      | Mm00516005_m1                 |
| <i>Scrab1</i>                     | Sr-b1                | Mm00450234_m1                 |

|                |      |               |
|----------------|------|---------------|
| <i>Ldlr</i>    |      | Mm01177349_m1 |
| <i>Abca1</i>   |      | Mm00442646_m1 |
| <i>Hmgcr</i>   |      | Mm01282499_m1 |
| <i>Abcg5</i>   |      | Mm00446241_m1 |
| <i>Abcg8</i>   |      | Mm00445980_m1 |
| <i>Slc10a1</i> | Ntcp | Mm00441421_m1 |
| <i>Abcb11</i>  | Bsep | Mm00445168_m1 |
| <i>Abcc2</i>   | Mrp2 | Mm00496899_m1 |
| <i>Abcc4</i>   | Mrp4 | Mm01226380_m1 |
| <i>Cyp7a1</i>  |      | Mm00484150_m1 |
| <i>Cyp8b1</i>  |      | Mm00501637_s1 |
| <i>Cyp27a1</i> |      | Mm00470430_m1 |
| <i>Gapdh</i>   |      | Mm99999915_g1 |

**Table S2** Primary and secondary antibodies used in Western blot

| Protein | Source                    | Dilution | Secondary antibody dilution |
|---------|---------------------------|----------|-----------------------------|
| Eng     | Santa Cruz (sc19793)      | 1:500    | 1:3000                      |
| MMP14   | Abcam (ab51074)           | 1:2000   | 1:4000                      |
| Sr-b1   | Novus (NB400-104)         | 1:2000   | 1:4000                      |
| Ldlr    | Thermo Fisher (PA5-20752) | 1:1000   | 1:2000                      |
| Abca1   | Thermo Fisher (PA1-16789) | 1:500    | 1:2000                      |
| Hmgcr   | Thermo Fisher (PA5-37367) | 1:1000   | 1:2000                      |
| Abcg5   | Thermo Fisher (PA5-69249) | 1:1000   | 1:2000                      |
| Abcg8   | Thermo Fisher (PA1-16798) | 1:500    | 1:2000                      |
| Ntcp    | Santa Cruz (sc94845)      | 1:3000   | 1:6000                      |
| Bsep    | Thermo Fisher (PA5-13105) | 1:1000   | 1:4000                      |
| Mrp2    | Thermo Fisher (PA5-49997) | 1:500    | 1:1000                      |
| Mrp4    | Cell Signaling (#12857S)  | 1:2000   | 1:4000                      |
| Cyp7a1  | Sigma (MABD42)            | 1:2000   | 1:5000                      |
| Cyp8b1  | Thermo Fisher (PA5-37088) | 1:1000   | 1:2000                      |
| Cyp27a1 | Thermo Fisher (PA5-27946) | 1:1000   | 1:2000                      |
| Gapdh   | Cell Signaling (#2118)    | 1:8000   | 1:10000                     |
